# Supplementary material
Source: Springer Nature journal article supplement (https://www.springermedizin.de/resource/supplementary/12884_2011_461_MOESM4_ESM.pdf/9457956)

# Total number of non-SBA births 2010-2020 (millions)

South Asia  
sub-Saharan Africa

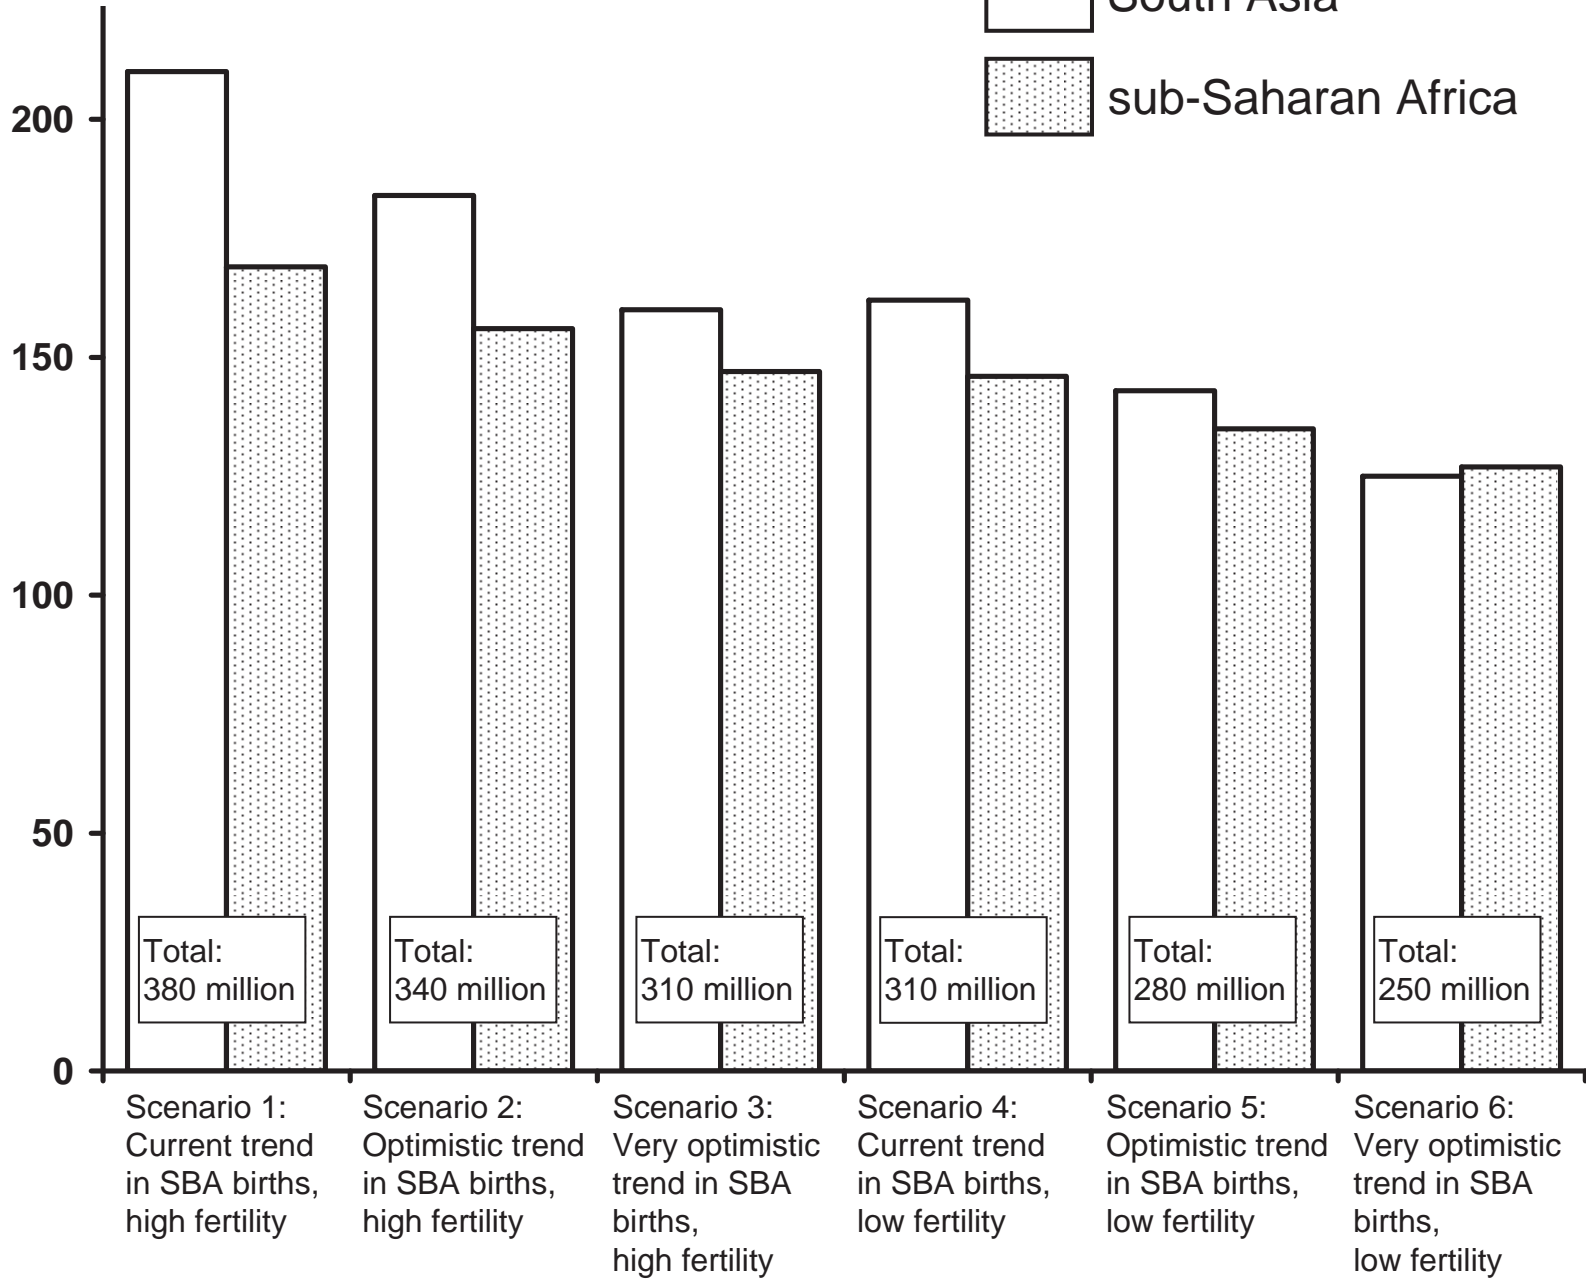

Supplement: MOESM4 [file 9457956]
